# Supplementary material
Source: publisher figshare collection journal article supplement (https://tandf.figshare.com/ndownloader/files/14700857)
Supplement: Supplementary file 1 [file 14700857]

Table S1. Sequences of primer pairs used in the real-time quantitative PCR reactions.

| Target gene | Primer sequences (5’–3’) | Accession ID | Reference |
| --- | --- | --- | --- |
| *β-actin* | F: ATGGATGAGGAAATCGCTGCC  R:CTCCCTGATGTCTGGGTCGTC | AF057040 | Jin et al., 2010 |
| *cat* | F: AGGGCAACTGGGATCTTACA  R: TTTATGGGACCAGACCTTGG | AF170069 | Jin et al., 2010 |
| *gpx1a* | F: AGATGTCATTCCTGCACACG  R: AAGGAGAAGCTTCCTCAGCC | AW232474 | Jin et al., 2010 |
| *sod1* | F: GTCGTCTGGCTTGTGGAGTG  R: TGTCAGCGGGCTAGTGCTT | Y12236 | Jin et al., 2010 |
| *sod2* | F: CCGGACTATGTTAAGGCCATCT  R: ACACTCGGTTGCTCTCTTTTCTCT | AY195857.1 | Jin et al., 2010 |
| *sdhb* | F: GGACAGCACACTGACCTT  R: GTTGCTCATGTCGGGCAC | NM_001098740 | Cambier et al., 2009 |
